# Supplementary material for: Reversible vapochromic response of polymer films doped with a highly emissive molecular rotor
Source: Royal Society of Chemistry journal article supplement (doi:10.1039/c4tc01737d), 2014-01-01
Supplement: c4tc01737d1.pdf [file c4tc01737d1.pdf]

## Supporting Information of the manuscript entitled “Reversible Vapochromic Response of Polymer Films Doped with a Highly-Emissive Molecular Rotor”

Pierpaolo Minei,<sup>a</sup> Matthias Koenig,<sup>b</sup> Antonella Battisti,<sup>c</sup> Muzaffer Ahmad,<sup>a</sup> Vincenzo Barone,<sup>a</sup> Tomas Torres,<sup>d,e</sup> Dirk M. Guldi,<sup>b</sup> Giuseppe Brancato,<sup>a</sup> Giovanni Bottari,<sup>d,e,\*</sup> Andrea Pucci<sup>f,g,\*</sup>

<sup>a</sup>Scuola Normale Superiore, Piazza dei Cavalieri 7, I-56126 Pisa, Italy

<sup>b</sup>Department of Chemistry and Pharmacy & Interdisciplinary Center for Molecular Materials (ICMM), Friedrich-Alexander-Universität Erlangen-Nürnberg, 91058, Erlangen, Germany

<sup>c</sup>NEST, Scuola Normale Superiore and Istituto Nanoscienze-CNR, Pisa, Italy

<sup>d</sup>Departamento de Química Orgánica, Universidad Autónoma de Madrid, 28049, Cantoblanco, Spain, e-mail: giovanni.bottari@uam.es

<sup>e</sup>IMDEA-Nanociencia, c/Faraday 9, Campus de Cantoblanco, 28049 Madrid, Spain

<sup>f</sup>Dipartimento di Chimica e Chimica Industriale, Università di Pisa, Pisa, Italy

<sup>g</sup>INSTM, Udr Pisa, Italy

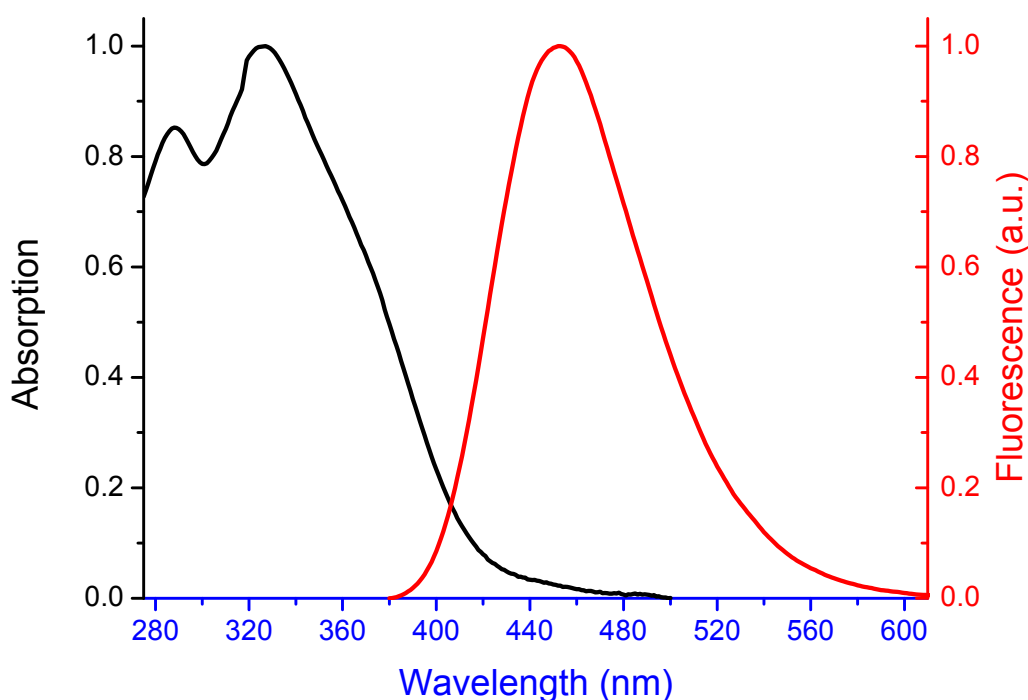

Fig. S1 Absorption (black spectrum) and emission (red spectrum) of a 0.05 wt.% DPAP/PMMA film ( $\lambda_{\text{exc}} = 325$  nm).

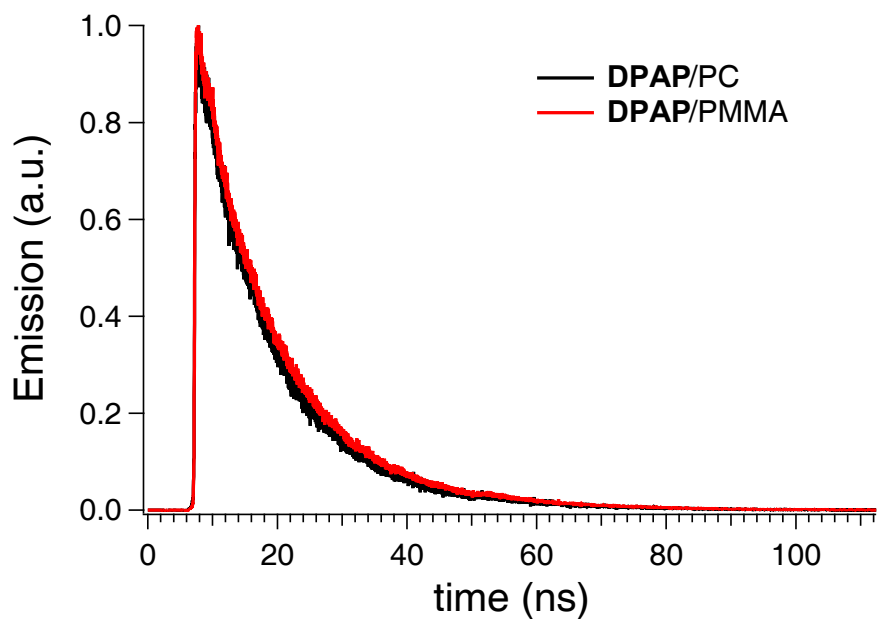

Fig. S2 Fluorescence lifetime profiles of **DPAP**/polymer films ( $\lambda_{\text{exc}} = 403 \text{ nm}$ ).

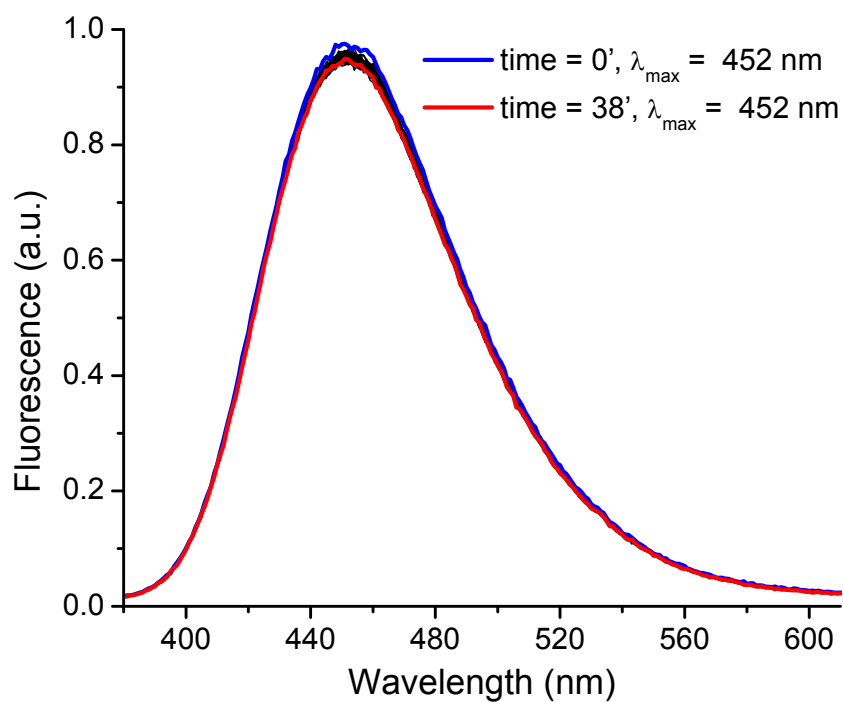

Fig. S3 Emission of a 0.05 wt.% **DPAP**/PMMA film as a function of the exposure to *n*-hexane vapours ( $\lambda_{\text{exc}} = 325 \text{ nm}$ ). The spectra were collected for 38 min. with a time interval of 1 min.

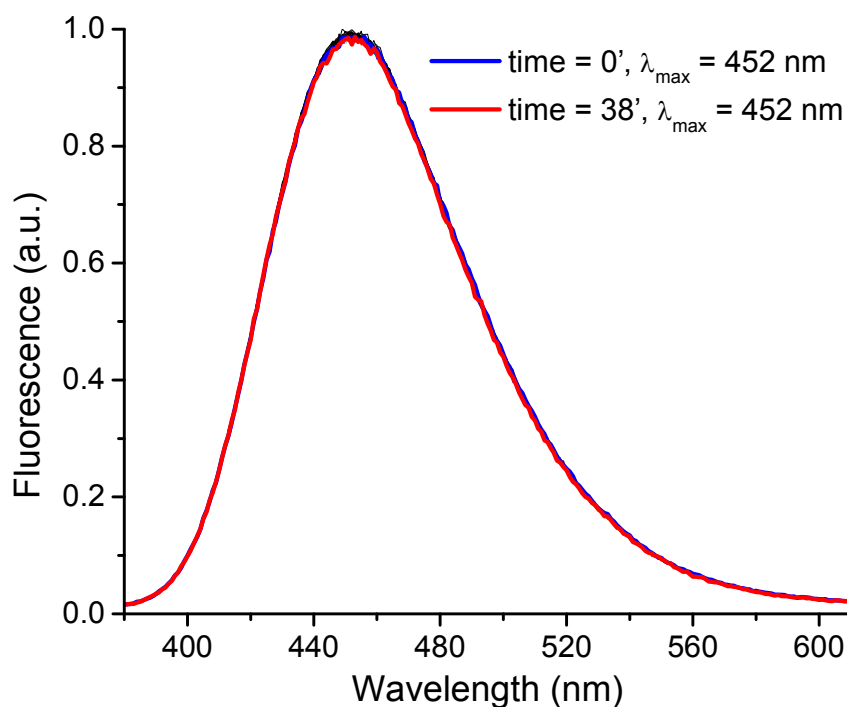

Fig. S4 Multiple emission spectra of a 0.05 wt.% **DPAP**/PMMA film ( $\lambda_{\text{exc}} = 325$  nm). The spectra were collected for 38 min. with a time interval of 1 min.

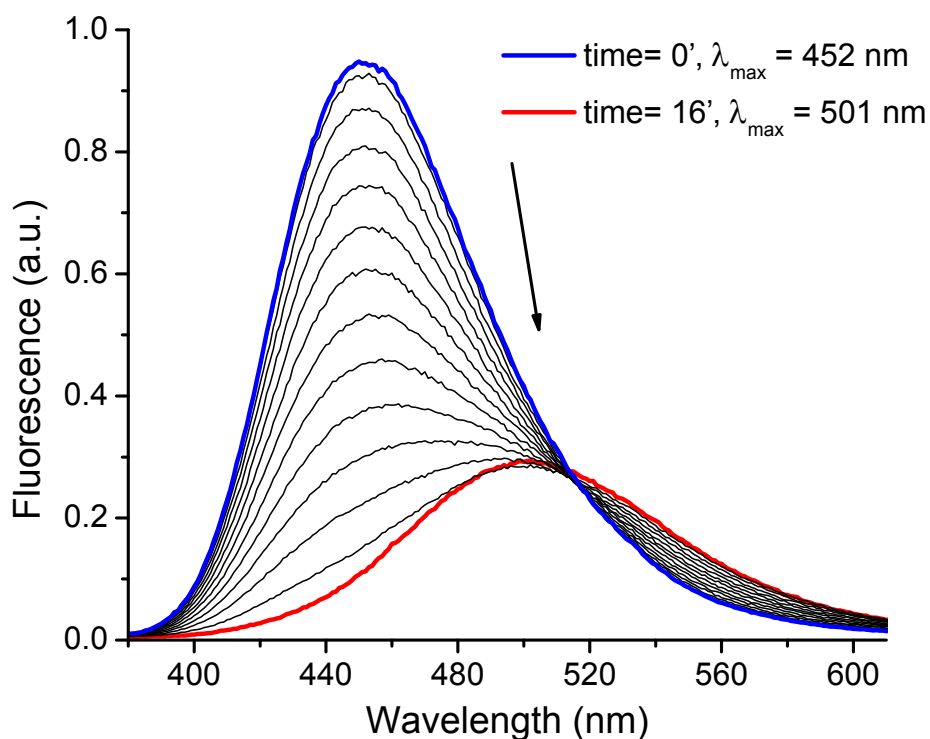

Fig. S5 Progressive changes in the fluorescence of a 0.1 wt.% **DPAP**/PMMA film as a function of the exposure to  $\text{CHCl}_3$  vapours ( $\lambda_{\text{exc}} = 325$  nm). The spectra were collected for 16 min. with a time interval of 1 min.

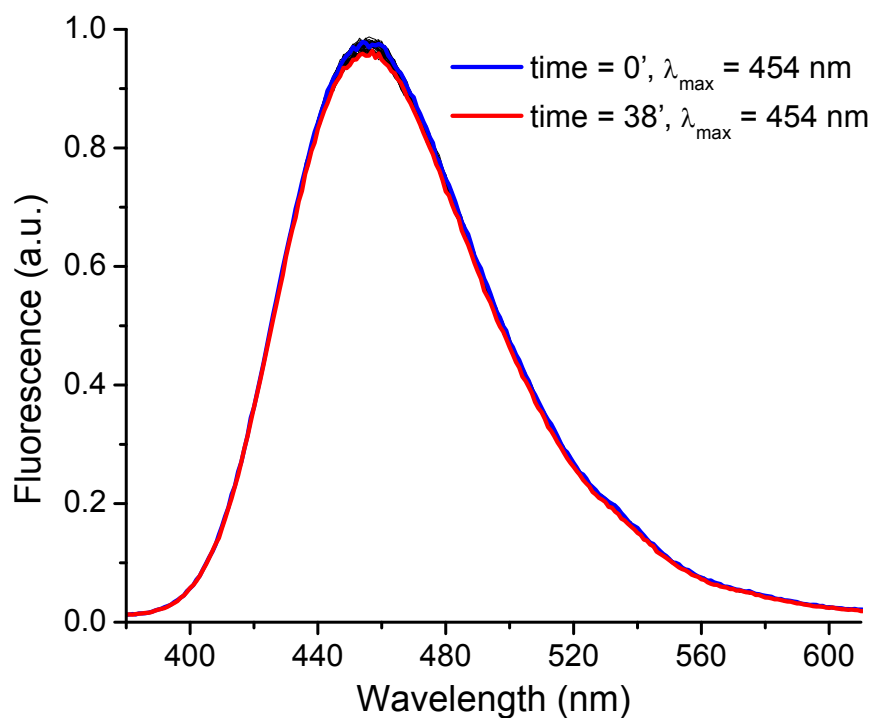

Fig. S6 Multiple emission spectra of a 0.05 wt.% **DPAP/PC** film ( $\lambda_{\text{exc}} = 325$  nm). The spectra were collected for 38 min. with a time interval of 1 min.

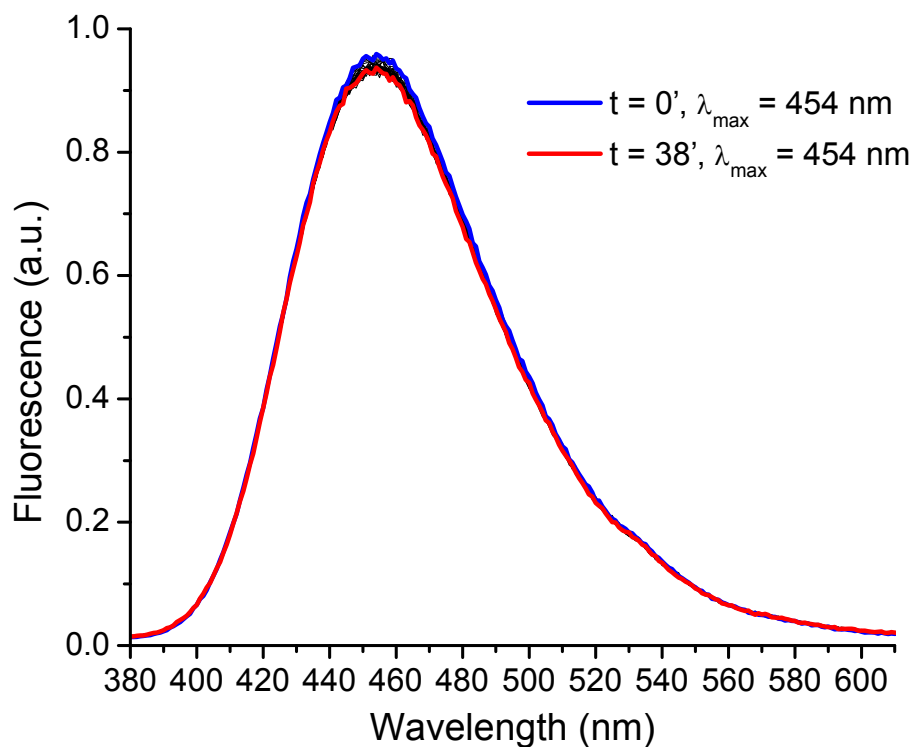

Fig. S7 Emission of a 0.05 wt.% **DPAP/PC** film as a function of the exposure to *n*-hexane vapours ( $\lambda_{\text{exc}} = 325$  nm). The spectra were collected for 38 min. with a time interval of 1 min.

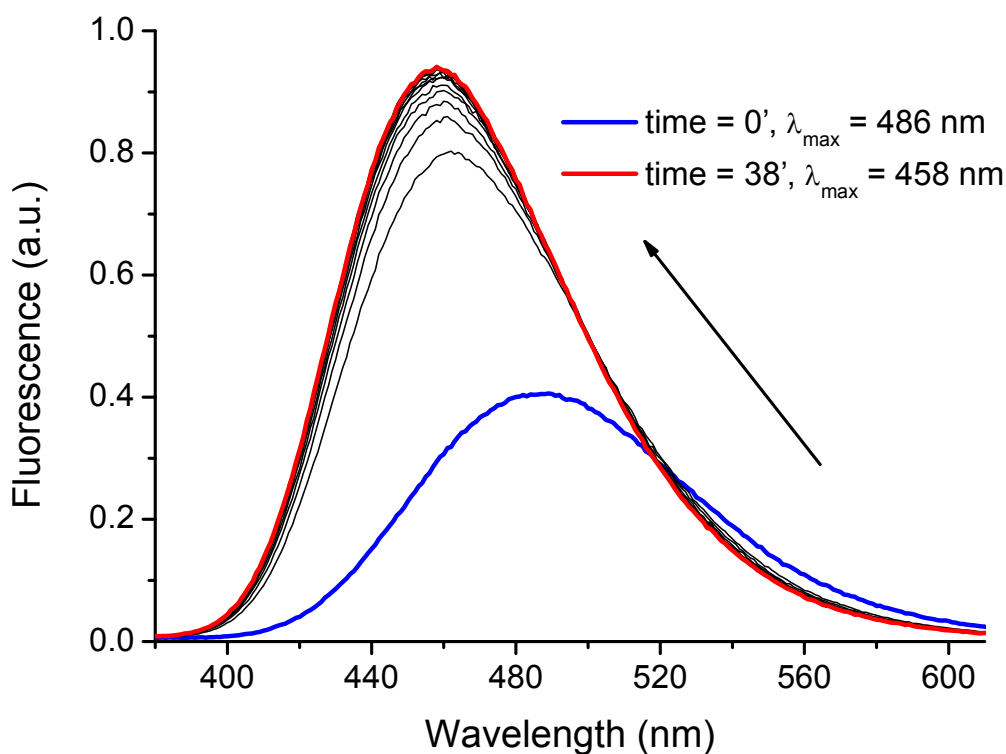

Fig. S8 Progressive changes in the emission of a THF-exposed 0.05 wt.% **DPAP/PC** film (after its equilibration in the presence of THF vapours) as a function of THF desorption ( $\lambda_{\text{exc}} = 325$  nm). The spectra were collected for 38 min. with a time interval of 1 min.

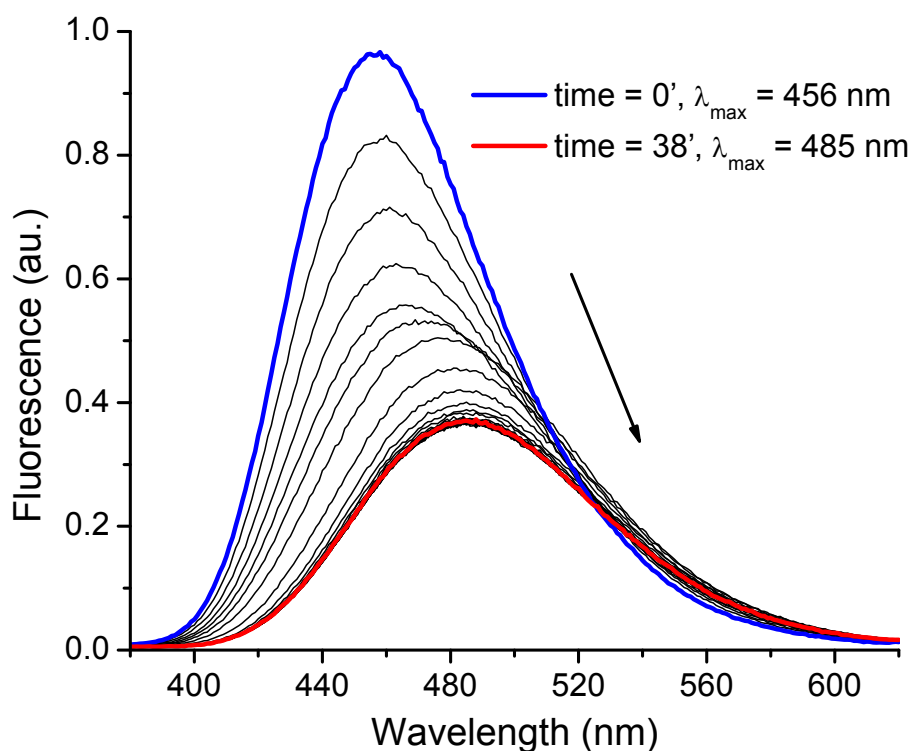

Fig. S9 Second exposure cycle of a 0.05 wt.% **DPAP/PC** film to THF vapours ( $\lambda_{\text{exc}} = 325$  nm). The spectra were collected for 38 min. with a time interval of 1 min.

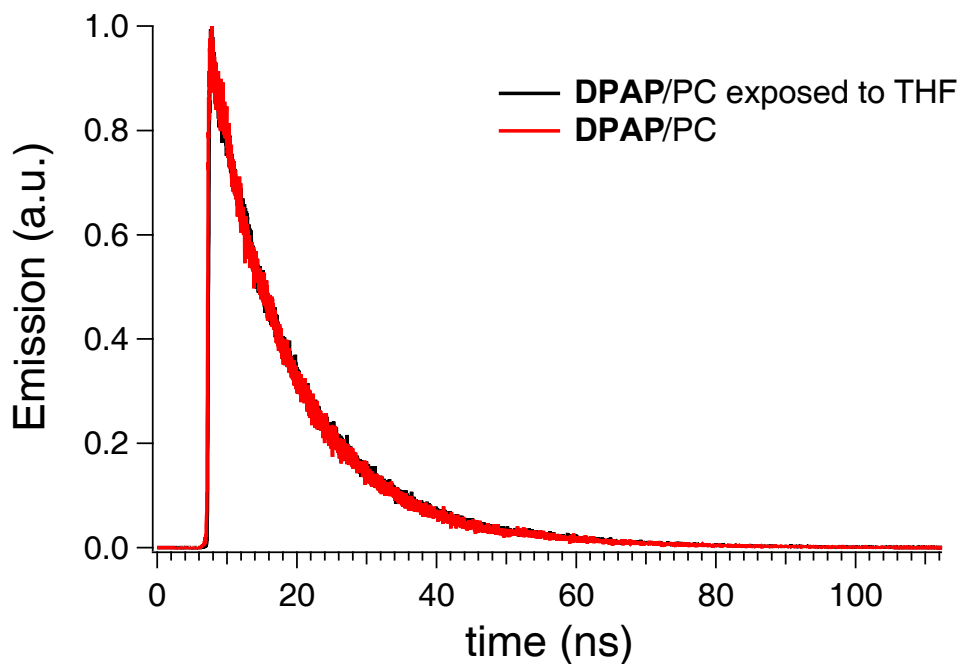

Fig. S10 Fluorescence lifetime profiles of **DPAP/PC** films before and after exposure to THF vapours ( $\lambda_{\text{exc}} = 403$  nm). In this latter case, after the THF vapour exposure, the investigated **DPAP/PC** film was allowed to stand at room temperature and atmospheric pressure for 40 minutes allowing the desorption of the trapped solvent molecules from the polymeric matrix.

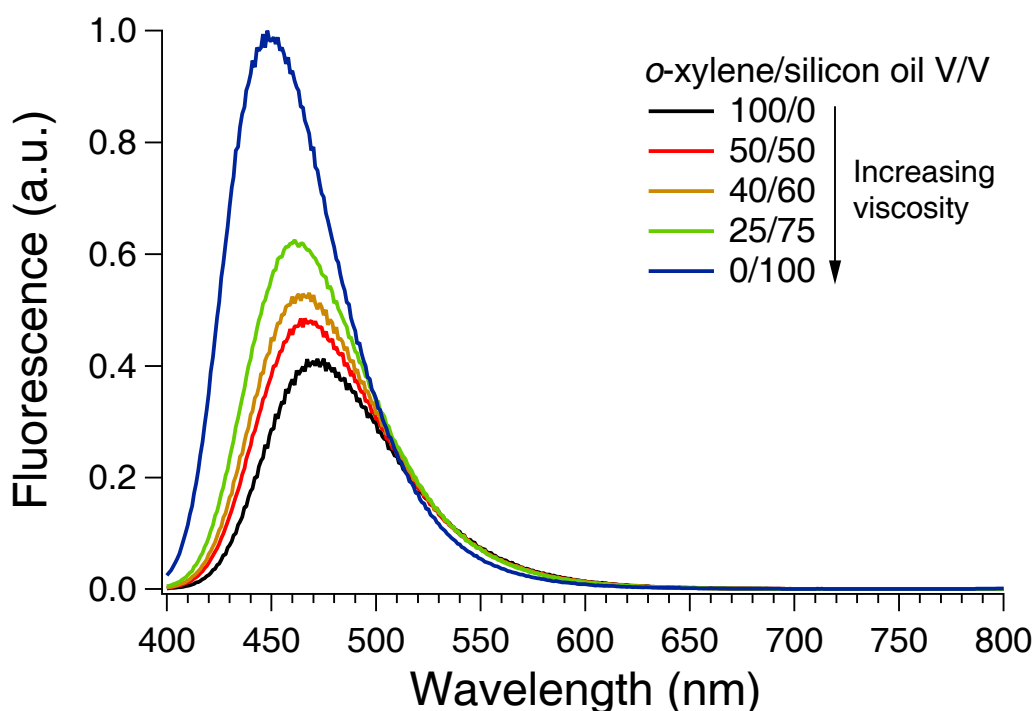

Fig. S11 Emission of **DPAP** in mixtures of *o*-xylene/silicon oil at different volume composition ( $\lambda_{\text{exc}} = 328$  nm). The OD at the excitation wavelength was 0.13 for all spectra.

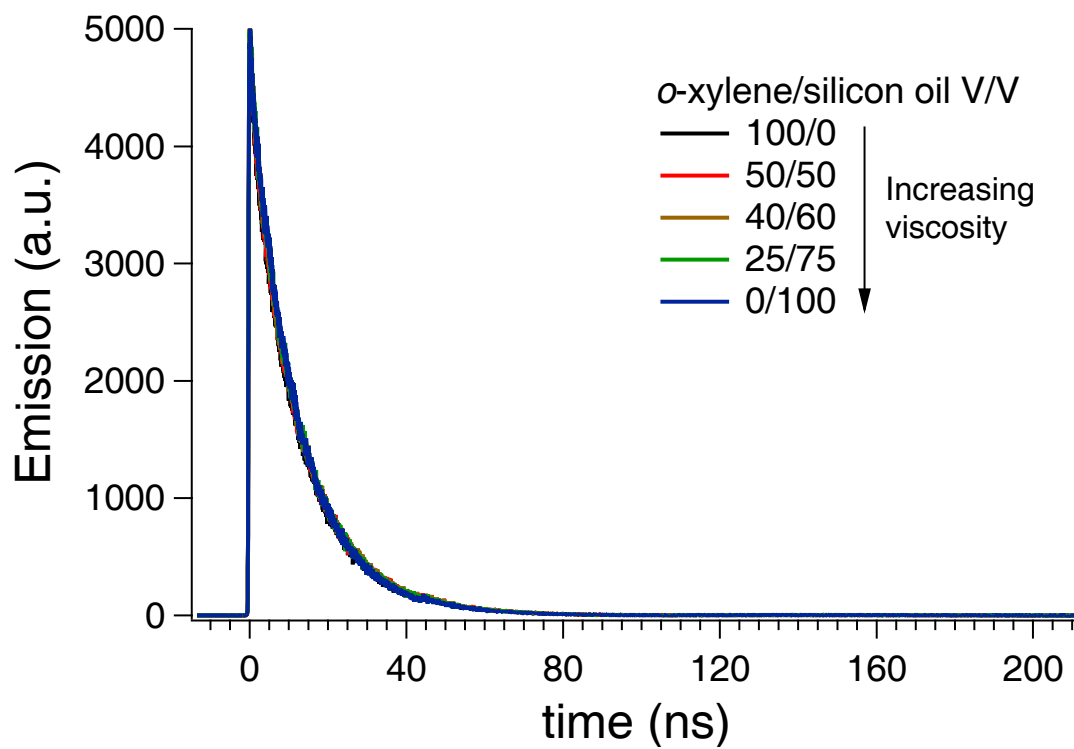

Fig. S12 Fluorescence lifetime profiles of **DPAP** in mixtures of *o*-xylene/silicon oil at different volume composition ( $\lambda_{\text{exc}} = 403 \text{ nm}$ ).
